# Supplementary material for: Incorporation of transuranium elements: coordination of Cm(iii) to human serum transferrin
Source: Royal Society of Chemistry journal article supplement (doi:10.1039/c8dt02915f), 2018-01-01
Supplement: c8dt02915f1.pdf [file c8dt02915f1.pdf]

## Supporting Information

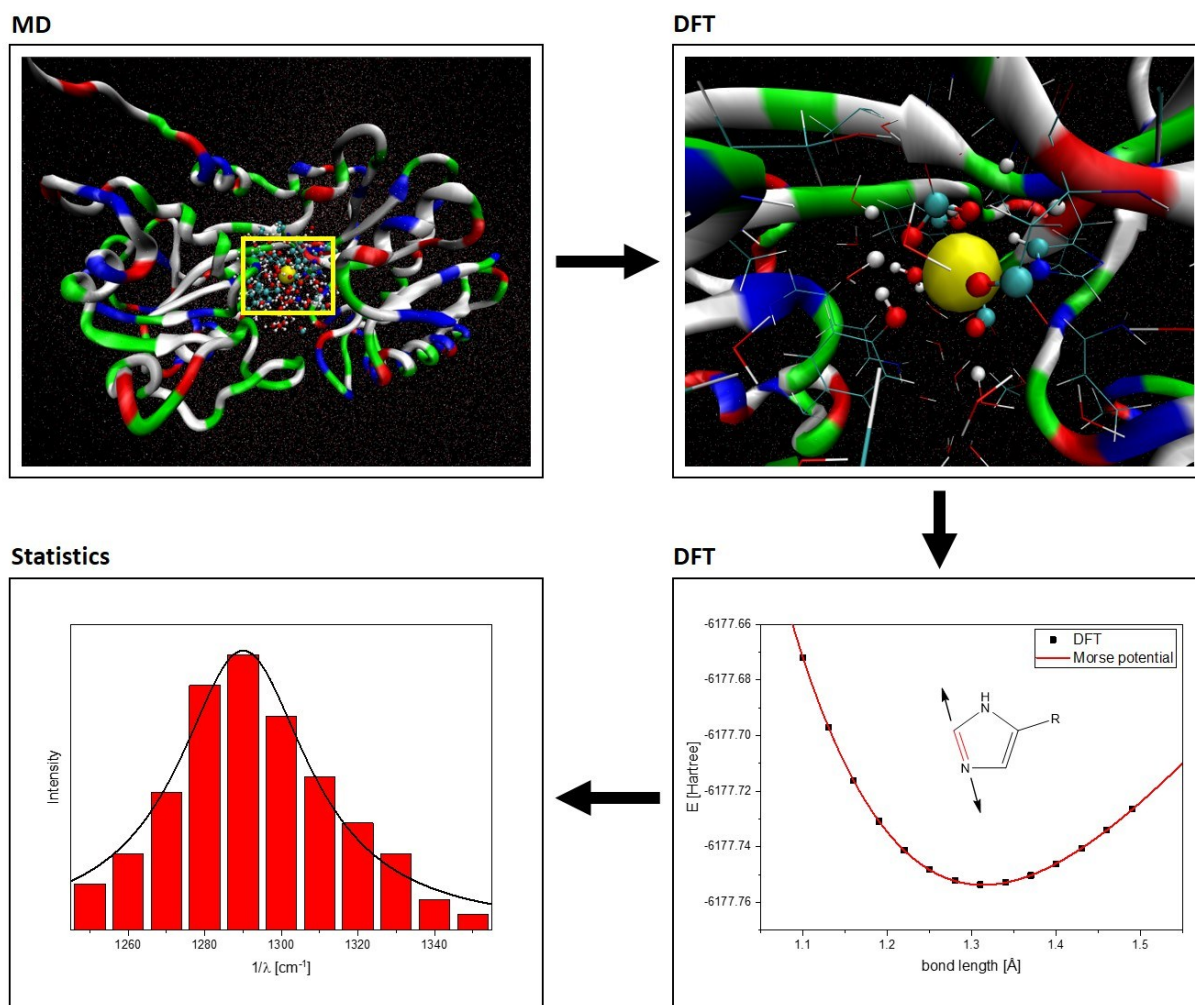

**Fig. 1** Schematic representation of the process to compute vibrational modes using a combination of MD and DFT.

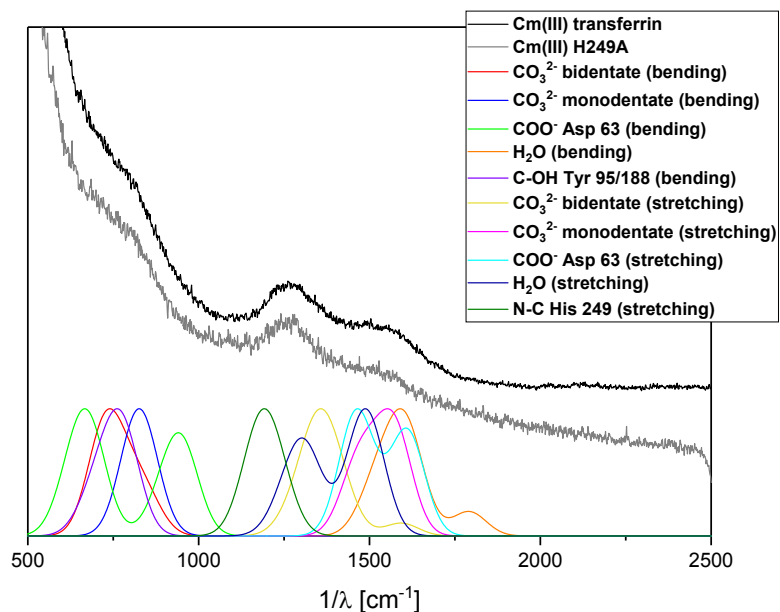

**Fig. 2** Comparison of the measured VSB spectra of Cm(III) transferrin and Cm(III) H249A with calculated vibrational frequencies from DFT optimizations (Tyr 95 and Tyr 188 protonated, OH<sup>-</sup> is neglected).

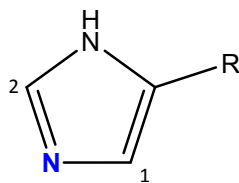

**Fig. 3** Labelling of the atoms in His 249 (directly coordinating N is labelled in blue).

**Table 1** Coordination numbers (CN) from MD simulation and bond-distances/vibrational frequencies (stretching vibration) from DFT optimizations (Tyr 95 and Tyr 188 protonated, OH<sup>-</sup> is neglected).

|                                             | CN  | bond length [Å] from DFT | bond length [Å] from MD |
|---------------------------------------------|-----|--------------------------|-------------------------|
| COO <sup>-</sup> Asp 63                     | 1.2 | 2.42 / 3.41              | 2.31                    |
| OH Tyr 95                                   | 1.0 | 2.75                     | 2.84                    |
| OH Tyr 188                                  | 0.9 | 2.90                     | 2.97                    |
| N-C His 249                                 | 0.9 | 2.98                     | 2.87                    |
| H <sub>2</sub> O                            | 1.9 | 2.46                     | 2.44                    |
| CO <sub>3</sub> <sup>2-</sup> (bidentate)   | 1.8 | 2.50                     | 2.27                    |
| CO <sub>3</sub> <sup>2-</sup> (monodentate) | 1.1 | 2.33                     | 2.20                    |

**Table 2** Vibrational frequencies (stretching and bending vibration) of the coordinating transferrin groups from the DFT optimizations (Tyr 95 and Tyr 188 protonated, OH<sup>-</sup> is neglected).

|                                                         | vibration [cm <sup>-1</sup> ] |
|---------------------------------------------------------|-------------------------------|
| COO <sup>-</sup> Asp 63 (stretching)                    | 1467/1611                     |
| COO <sup>-</sup> Asp 63 (bending)                       | 670/937                       |
| OH Tyr 95 (stretching)                                  | 1158/3393                     |
| OH Tyr 188 (stretching)                                 | 1201/3041                     |
| C-OH Tyr 95/Tyr 188 (bending)                           | 756                           |
| N-C His 249 (stretching)                                | 1298/1490                     |
| H <sub>2</sub> O (stretching)                           | 3285                          |
| H <sub>2</sub> O (bending)                              | 1591                          |
| CO <sub>3</sub> <sup>2-</sup> (bidentate; stretching)   | 1357                          |
| CO <sub>3</sub> <sup>2-</sup> (bidentate; bending)      | 792                           |
| CO <sub>3</sub> <sup>2-</sup> (monodentate; stretching) | 1549                          |
| CO <sub>3</sub> <sup>2-</sup> (monodentate; bending)    | 815                           |
